# Supplementary material
Source: PubMed Central journal article supplement (PMC1838623)
Supplement: pnas_0608148104_1.pdf [file pnas_0608148104_1.pdf]

**Table 1. Power functions describing simulated declines in nutrient recycling as fish species richness is reduced under alternative extinction scenarios**

| Site                           | Extinction scenario            | Nutrient                | <i>a</i> (95% CI)   | <i>b</i> (95% CI) | R <sup>2</sup>   | Figure 1 panel |   |
|--------------------------------|--------------------------------|-------------------------|---------------------|-------------------|------------------|----------------|---|
| RLM                            | Random, No compensation        | N                       | 1.38 (1.34-1.42)    | 1.01 (1.00-1.01)  | 0.69             | A              |   |
|                                |                                | P                       | 0.04 (0.04-0.05)    | 1.00 (0.99-1.00)  | 0.89             | B              |   |
|                                | Random, Energetic compensation | N                       | 19.51 (19.28-19.74) | 0.39 (0.38-0.39)  | 0.64             | G              |   |
|                                |                                | P                       | 1.18 (1.17-1.18)    | 0.24 (0.24-0.24)  | 0.58             | H              |   |
|                                | Population size                | N                       | 17.56 (17.39-17.73) | 0.43 (0.43-0.44)  | 0.77             | M              |   |
|                                |                                | P                       | 0.70 (0.70-0.70)    | 0.38 (0.37-0.38)  | 0.89             | N              |   |
|                                | Best-case                      | N                       | 50.34 (50.19-50.49) | 0.17 (0.17-0.17)  | 0.85             | M              |   |
|                                |                                | P                       | 1.09 (1.09-1.10)    | 0.27 (0.27-0.27)  | 0.86             | N              |   |
|                                | Trophic position               | N                       | 1.66 (1.61-1.71)    | 0.96 (0.95-0.97)  | 0.68             | S              |   |
|                                |                                | P                       | 0.05 (0.05-0.05)    | 0.99 (0.99-0.99)  | 0.89             | T              |   |
|                                | Body size                      | N                       | 0.01 (0.01-0.01)    | 2.13 (2.12-2.14)  | 0.85             | Y              |   |
|                                |                                | P                       | 0.05 (0.05-0.05)    | 0.98 (0.98-0.98)  | 0.94             | Z              |   |
|                                | Fishing pressure               | N                       | 0.00 (0.00-0.00)    | 4.92 (4.84-5.00)  | 0.63             | AE             |   |
|                                |                                | P                       | 0.00 (0.00-0.00)    | 2.40 (2.38-2.42)  | 0.80             | AF             |   |
|                                | Worst-case                     | N                       | 0.00 (0.00-0.00)    | 8.24 (8.21-8.28)  | 0.92             | AE             |   |
|                                |                                | P                       | 0.00 (0.00-0.00)    | 6.56 (6.54-6.57)  | 0.98             | AF             |   |
|                                | LT                             | Random, No compensation | N                   | 3.06 (3.01-3.10)  | 1.02 (1.01-1.02) | 0.93           | D |
|                                |                                |                         | P                   | 0.09 (0.09-0.09)  | 1.02 (1.01-1.02) | 0.92           | E |
| Random, Energetic compensation |                                | N                       | 62.04 (61.13-62.95) | 0.21 (0.21-0.22)  | 0.35             | J              |   |
|                                |                                | P                       | 1.60 (1.58-1.63)    | 0.24 (0.24-0.25)  | 0.42             | K              |   |
| Population size                |                                | N                       | 15.68 (15.59-15.77) | 0.59 (0.59-0.59)  | 0.95             | P              |   |
|                                |                                | P                       | 0.54 (0.54-0.54)    | 0.54 (0.53-0.54)  | 0.95             | Q              |   |
| Best-case                      |                                | N                       | 19.66 (19.56-19.76) | 0.53 (0.53-0.53)  | 0.96             | P              |   |
|                                |                                | P                       | 0.68 (0.68-0.68)    | 0.48 (0.47-0.48)  | 0.95             | Q              |   |
| Trophic position               |                                | N                       | 4.87 (4.81-4.93)    | 0.90 (0.90-0.90)  | 0.93             | V              |   |
|                                |                                | P                       | 0.11 (0.10-0.11)    | 0.96 (0.96-0.97)  | 0.93             | W              |   |
| Body size                      |                                | N                       | 2.18 (2.15-2.21)    | 1.12 (1.12-1.12)  | 0.95             | AB             |   |
|                                |                                | P                       | 0.12 (0.12-0.12)    | 0.94 (0.93-0.94)  | 0.93             | AC             |   |
| Fishing pressure               |                                | N                       | 1.95 (1.90-2.00)    | 1.17 (1.16-1.17)  | 0.87             | AH             |   |
|                                |                                | P                       | 0.13 (0.13-0.13)    | 0.92 (0.92-0.93)  | 0.88             | AI             |   |
| Worst-case                     |                                | N                       | 0.04 (0.04-0.04)    | 2.24 (2.23-2.24)  | 0.98             | AH             |   |
|                                |                                | P                       | 0.00 (0.00-0.00)    | 2.64 (2.63-2.65)  | 0.98             | AI             |   |

Coefficients (*a*) and exponents (*b*) were fitted to a power function describing simulated nutrient recycling (NR) as a function of fish species richness (*S*):  $NR = aS^b$ . Extinction scenarios are described in the text, and separate analyses were conducted for nitrogen (N) and phosphorus (P).
