# Supplementary material
Source: PubMed Central journal article supplement (PMC1838623)
Supplement: pnas_0608148104_2.pdf [file pnas_0608148104_2.pdf]

**Table 2. Species recorded in creel surveys at each site, and their rank in terms of fishing pressure (based on Chesson's  $\alpha$ ), fishing catch (based on biomass harvested), body mass, population density, and population biomass**

| Site | Species                              | Species Rank     |               |           |                    |                    |
|------|--------------------------------------|------------------|---------------|-----------|--------------------|--------------------|
|      |                                      | Fishing pressure | Fishing catch | Body mass | Population density | Population biomass |
| RLM  | <i>Prochilodus mariae</i>            | 1                | 1             | 5         | 14                 | 1                  |
|      | <i>Salminus hilarii</i>              | 2                | 3             | 6         | 36                 | 9                  |
|      | <i>Rhamdia quelen</i>                | 3                | 9             | 15        | 52                 | 44                 |
|      | <i>Brycon whitei</i>                 | 4                | 2             | 3         | 35                 | 5                  |
|      | <i>Hoplias malabaricus</i>           | 5                | 4             | 12        | 43                 | 20                 |
|      | <i>Leporellus vittatus</i>           | 6                | 5             | 14        | 44                 | 22                 |
|      | <i>Astyanax metae</i>                | 7                | 7             | 18        | 34                 | 24                 |
|      | <i>Leporinus striatus</i>            | 8                | 10            | 17        | 30                 | 16                 |
|      | <i>Astyanax integer</i>              | 9                | 6             | 19        | 20                 | 8                  |
|      | <i>Hypostomus sp.</i>                | 10               | 8             | 20        | 15                 | 6                  |
|      | <i>Aequidens pulcher</i>             | 11               | 12            | 21        | 27                 | 18                 |
|      | <i>Crenicichla geayi</i>             | 12               | 11            | 28        | 10                 | 7                  |
| LT   | <i>Lates microlepis</i>              | 1                | 2             | 11        | 21                 | 17                 |
|      | <i>Plecodus straeleni</i>            | 2                | 13            | 16        | 34                 | 34                 |
|      | <i>Limnotilapia dardeni</i>          | 3                | 1             | 12        | 9                  | 7                  |
|      | <i>Petrochromis orthognathus</i>     | 4                | 7             | 6         | 24                 | 15                 |
|      | <i>Cyathopharynx furcifer</i>        | 5                | 6             | 8         | 19                 | 11                 |
|      | <i>Lamprologus lemarii</i>           | 6                | 11            | 9         | 31                 | 25                 |
|      | <i>Haplotaxodon microlepis</i>       | 7                | 5             | 4         | 16                 | 9                  |
|      | <i>Petrochromis famula</i>           | 8                | 3             | 1         | 12                 | 4                  |
|      | <i>Varicorhinus sp.</i>              | 9                | 12            | 10        | 29                 | 27                 |
|      | <i>Petrochromis sp. moshi</i>        | 10               | 4             | 2         | 13                 | 5                  |
|      | <i>Lobochilotes labiatus</i>         | 11               | 10            | 5         | 26                 | 13                 |
|      | <i>Altolamprologus compressiceps</i> | 12               | 14            | 23        | 25                 | 26                 |
|      | <i>Lepidolamprologus elongatus</i>   | 13               | 9             | 22        | 8                  | 12                 |
|      | <i>Petrochromis sp. kazumbe</i>      | 14               | 8             | 7         | 5                  | 1                  |

Rankings are based on a total of 69 species in RLM and 36 species in LT.
