# Supplementary material
Source: PubMed Central journal article supplement (PMC1838623)
Supplement: pnas_0608148104_3.pdf [file pnas_0608148104_3.pdf]

**Table 3. Key to species indicated in Fig. 3**

| <b>Site</b> | <b>Species (abbreviation)</b>              | <b>Figure 3 panel</b> |
|-------------|--------------------------------------------|-----------------------|
| RLM         | <i>Prochilodus mariae</i> (Prma)           | A, C                  |
|             | <i>Parodon apolinari</i> (Paap)            | A, C                  |
|             | <i>Chaetostoma milesi</i> (Chmi)           | A, C                  |
|             | <i>Ancistrus triradiatus</i> (Antr)        | A, C                  |
|             | <i>Crenicichla geayi</i> (Crge)            | A, C                  |
|             | <i>Brycon whitei</i> (Brwh)                | A, C                  |
|             | <i>Salminus hilarii</i> (Sahi)             | A, C                  |
|             | <i>Bryconamericus cismontanus</i> (Brci)   | A, C                  |
|             | <i>Astyanax integer</i> (Asin)             | C                     |
|             | <i>Cetopsorhamdia rosei</i> (Cero)         | C                     |
|             | <i>Trichomycterus</i> sp. (Trsp)           | C                     |
| LT          | <i>Petrochromis</i> sp. kazumbe (Peka)     | B, D                  |
|             | <i>Neolamprologus brichardi</i> (Nebr)     | B, D                  |
|             | <i>Petrochromis famula</i> (Pefa)          | B, D                  |
|             | <i>Ophthalmotilapia heterodonta</i> (Ophe) | B, D                  |
|             | <i>Petrochromis</i> sp. moshi (Pemo)       | B, D                  |
|             | <i>Tropheus brichardi</i> (Trbr)           | B, D                  |
|             | <i>Lamprichthys tanganyicae</i> (Lata)     | B, D                  |
|             | <i>Lamprologus callipterus</i> (Laca)      | B, D                  |
|             | <i>Haplotaxodon microlepis</i> (Hami)      | D                     |
